# Supplementary material
Source: publisher site journal article supplement (https://www.dovepress.com/article/338937)
Supplement: Supplementary file 1 [file get_supplementary_file.php]

**Supplementary materials**

**Material and methods**

***Exosome labeling and endothelial cellular uptake***

To ensure exosome internalization in HUVECs, as described previously,1 the exosomes were stained with PKH67 membrane dye (Sigma, St. Louis, MO, USA), while the HUVECs were stained with 4’,6-diamidino-2-phenylindole (DAPI, Sigma, UK) according to the manufacturer’s protocol. After culturing the HUVECs with the exosomes for 0, 1, 3, 6, 12, and 24 h, the ratio of the exosome uptake was analyzed by flow cytometric analysis. At 6 h, images were obtained using a laser scanning confocal microscope (Leica, JEM-1220; JEOL, Japan) equipped with a FACSCanto II system (BD Biosciences, San Jose, California, USA).

***Transfection studies***

The miRNA mimics and anti-miRNAs were designed and purchased from RiboBio, Guangzhou, China. HUVEC transfection was performed using the Lipofectamine 2000 Transfection Reagent (Thermo Fisher Scientific, Massachusetts, USA) and Opti-Minimal Essential Medium (MEM) serum-free medium (Gibco, Grand Island, NY, USA) according to the manufacturer’s instructions. The cell medium was changed to DMEM (Gibco, BRL, USA) 8 h after transfection. The following assays were performed 48 h after transfection. To overexpress TSC1, HUVECs were transfected with pcDNA-TSC1 plasmid vector (GenePharma, Shanghai, China) using Lipofectamine 2000 Transfection Reagent according to the manufacturer’s instructions，and HUVECs transfected with pcDNA-NC were used as controls. The cells were cultured at 37 °C for 72 h for the following experiments.

For exosomal transfection, the exosomes were loaded with inhibitor miR-126-3p, mimic miR-126-3p, and a negative control (RiboBio, Guangzhou, China) using Exo-Fect Exosome Transfection Kits (System Biosciences, California, USA). Briefly, 10 µL Exo-Fect solution, 20 pmol miR-126-3p or inhibitor of miR-126-3p, and 50 µL exosomes were mixed and incubated according to the manufacturer’s instructions.

***Mouse model of*** ***unilateral hind limb ischemia***

The left hind limb ischemia model was built as described previously.2All surgical procedures were performed under sterile conditions. Briefly, the mice were anesthetized using 1–3 % isoflurane, and a 10 mm vertical longitudinal incision was made. Then, using 7-0 silk, the left common femoral artery and its branches were dissected and ligated. Next, the arterial segment between the ligatures was excised. After the surgical procedure, blood perfusion was assessed by scanning both rear paws using Laser Doppler Perfusion imaging (LDI) equipment (Moor, Wilmington, Delaware). Con-Exo + mimic miR-126-3p, Con-Exo + mimic NC, AMI-Exo + inhibitor miR-126-3p, and AMI-Exo + inhibitor NC were diluted to a concentration of approximately 1×103 μg/mL in PBS and then injected (200 μL) into the quadricep muscles of the hind limb of the ischemic mice (n = 8 per group) using a 1 mL syringe. LDI) was used to evaluate the blood flow perfusion at 1, 3, 7, and 14 days. To maintain a constant body temperature, the animals wereplaced in a thermostat at 37 °C for 10 min before LDI. Data were reported as the ratio of mean velocity in the left and right rear paws.

***Mouse model of*** ***AMI***

Mice underwent surgery to ligate the left anterior descending coronary artery as reported previously3. The exosomes were diluted to a concentration of approximately 1×103 μg/mL in PBS and then injected (20 μL) intramyocardially into the left ventricular wall (border zone) at two different locations immediately after the left anterior descending ligation (reference). The PBS group underwent the same surgery but were injected with only 20 μL PBS as negative control. Tissue was harvested at day 14 after AMI for histological analysis.

***Histological and immunofluorescence analysis***

The gastrocnemius muscle and heart were harvested on day 14 after surgery; it was trimmed, fixed with paraformaldehyde. Then embedded in paraffin or O.C.T. Compound after sugar dehydration. The sections were stained by hematoxylin and eosin (H&E staining). For immunohistochemistry staining, the sections were incubated at 4 °C overnight, with primary antibodies against CD31 (1:200, Novus Biologicals, 2284) and α-SMA (1:50000, Abcam, ab240654). The next day, the sections were incubated with secondary antibodies (Zsbio, Beijing, China). Images were acquired using optical microscope (Nikon, Tokyo, Japan).

For immunofluorescence staining, the sections were incubated with primary antibodies like immunohistochemistry. The next day, it incubated with secondary antibodies(1:200, Abcam, ab488; ab555) for 2 hours. Nuclei were visualized by counterstaining with DAPI (Beyotime, Shanghai, China). Images were acquired using laser scanning confocal microscope (Leica, JEM-1220; JEOL, Tokyo, Japan) and processed using Image Pro Plus 5 (USA).

***Bioinformatics analysis***

Four bioinformatics and online prediction databases (starBase, miRWalk, miRcode, and miRDB) were utilized to predict possible downstream targets of miR-126-3p. The binding site of miR-126-3p in the 3ʹ UTR of tuberous sclerosis complex 1 (TSC1) was predicted using the public database starBase.


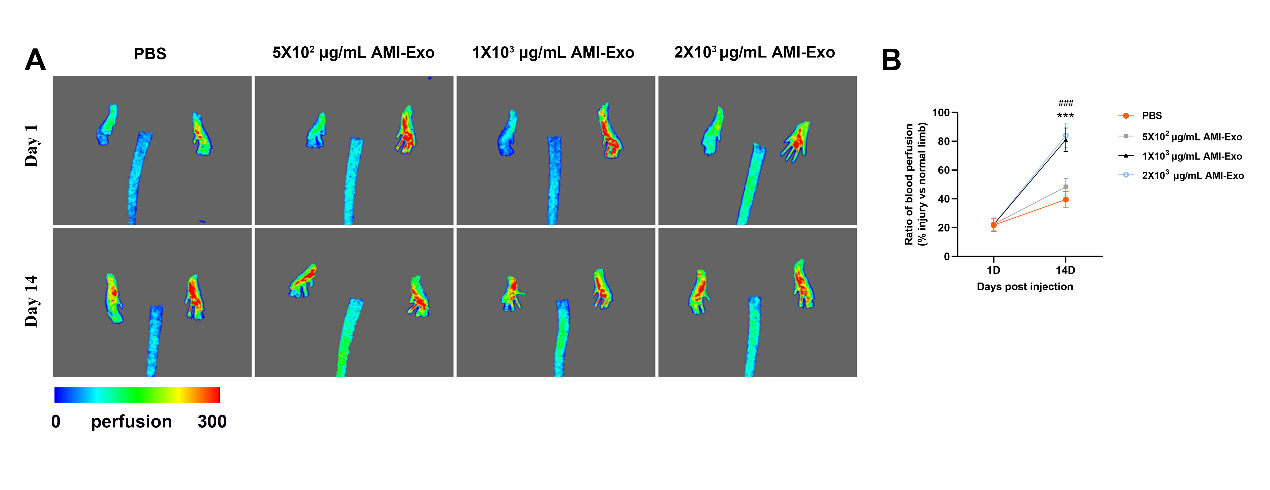


**Figure S1. The effect of different amount of exosomes on mouse ischemic injury after hind limb ischemia.** (A) Blood flow perfusion was measured via laser Doppler imaging on 1 and 14 days after surgery. 200 μL PBS and different concentration AMI-Exo, 5×102 μg/mL, 1×103 μg/mL, and 2×103 μg/mL, were injected intramuscularly on day 1 after surgery. The left paw was ischemic and the right paw was normal control (*n* = 3). (B) The blood perfusion recovery was calculated as the perfusion ratio of the mean velocity in the left rear paw divided by that in the right rear paw. *** means mimic miR-126-3p vs. mimic NC, ### means inhibitor miR-126-3p vs. inhibitor NC. ****p* < 0.001, ###*p* < 0.001.

**Table S1. The primer and sequence of PCR.**

| PCR | Primer | Sequence |
| --- | --- | --- |
| miR-126-3p | Forward  Reverse | 5’-UCGUACCGUGAGUAAUAAUGCG-3’  5'-GTGCAGGGTCCGAGGT-3' |
| miR-143 | Forward  Reverse | 5’-GCGCTGAGATGAAGCACTG-3’  5'-GTGCAGGGTCCGAGGT-3' |
| miR-17-5p | Forward  Reverse | 5ʹ-GTGCTTACAGTGCAGGTAGGT-3ʹ  5'-GTGCAGGGTCCGAGGT-3' |
| miR-21-5p | Forward  Reverse | 5’-UAGCUUAUCAGACUGAUGUUGA-3’  5'-GTGCAGGGTCCGAGGT-3' |
| miR-939-5p | Forward  Reverse | 5′-ACACTCCAGCTGGGTGGGGAGCTGAGGCTCTG-3′  5'-GTGCAGGGTCCGAGGT-3' |
| TSC1 | Forward  Reverse | 5′-GGAGCAGCGTGACACTATGGTAAC-3′  5′-GTCTGTAATTCCTGGCTCTGGTTGTAG-3′ |
| U6 | Forward  Reverse | 5′-GCTTCGGCAGCACATATACTAAAAT-3′  5′-CGCTTCACGAATTTGCGTGTCAT-3′ |
| GAPDH | Forward  Reverse | 5′-AGAAGGCTGGGGCTCATTTG-3′  5′-AGGGGCCATCCACAGTCTTC-3′ |

# References

1. Zeng Z, Li Y, Pan Y, et al. Cancer-derived exosomal miR-25-3p promotes pre-metastatic niche formation by inducing vascular permeability and angiogenesis. Nat Commun. 2018; 9(1): 5395. doi: 10.1038/s41467-018-07810-w

2. Stabile E, Burnett MS, Watkins C, et al. Impaired arteriogenic response to acute hindlimb ischemia in CD4-knockout mice. Circulation. 2003; 108(2): 205-10. doi: 10.1161/01.CIR.0000079225.50817.71

3. Krishnamurthy P,  Thal M,  Verma S, et al., Interleukin-10 deficiency impairs bone marrow-derived endothelial progenitor cell survival and function in ischemic myocardium.Circulation Research. 2011;109(11):1280–89. doi:10.1161/CIRCRESAHA.111.248369
